# Supplementary material
Source: PubMed Central journal article supplement (PMC3736316)

# Supplementary Figure 1

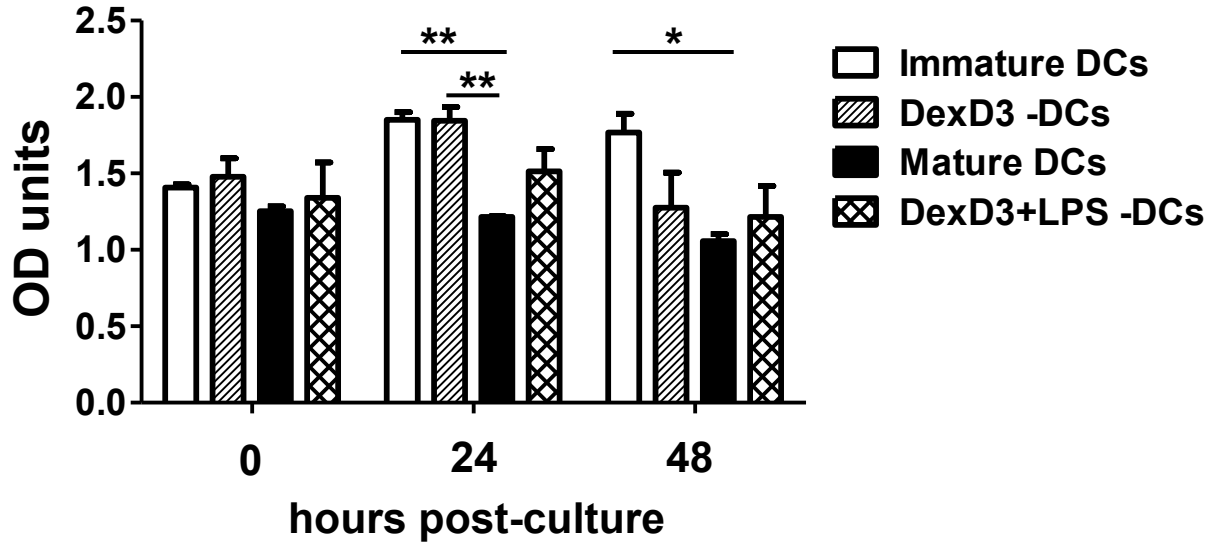

Supplement: NIHMS52212-supplement-2.pdf [file NIHMS52212-supplement-2.pdf]
